# Supplementary material for: SNICAR-ADv4: A physically based radiative transfer model to represent the spectral albedo of glacier ice
Source: Copernicus journal article supplement (doi:10.5194/tc-2021-272), 2021-09-23
Supplement: Supplementary file [file tc-2021-272-AC1-supplement.pdf]

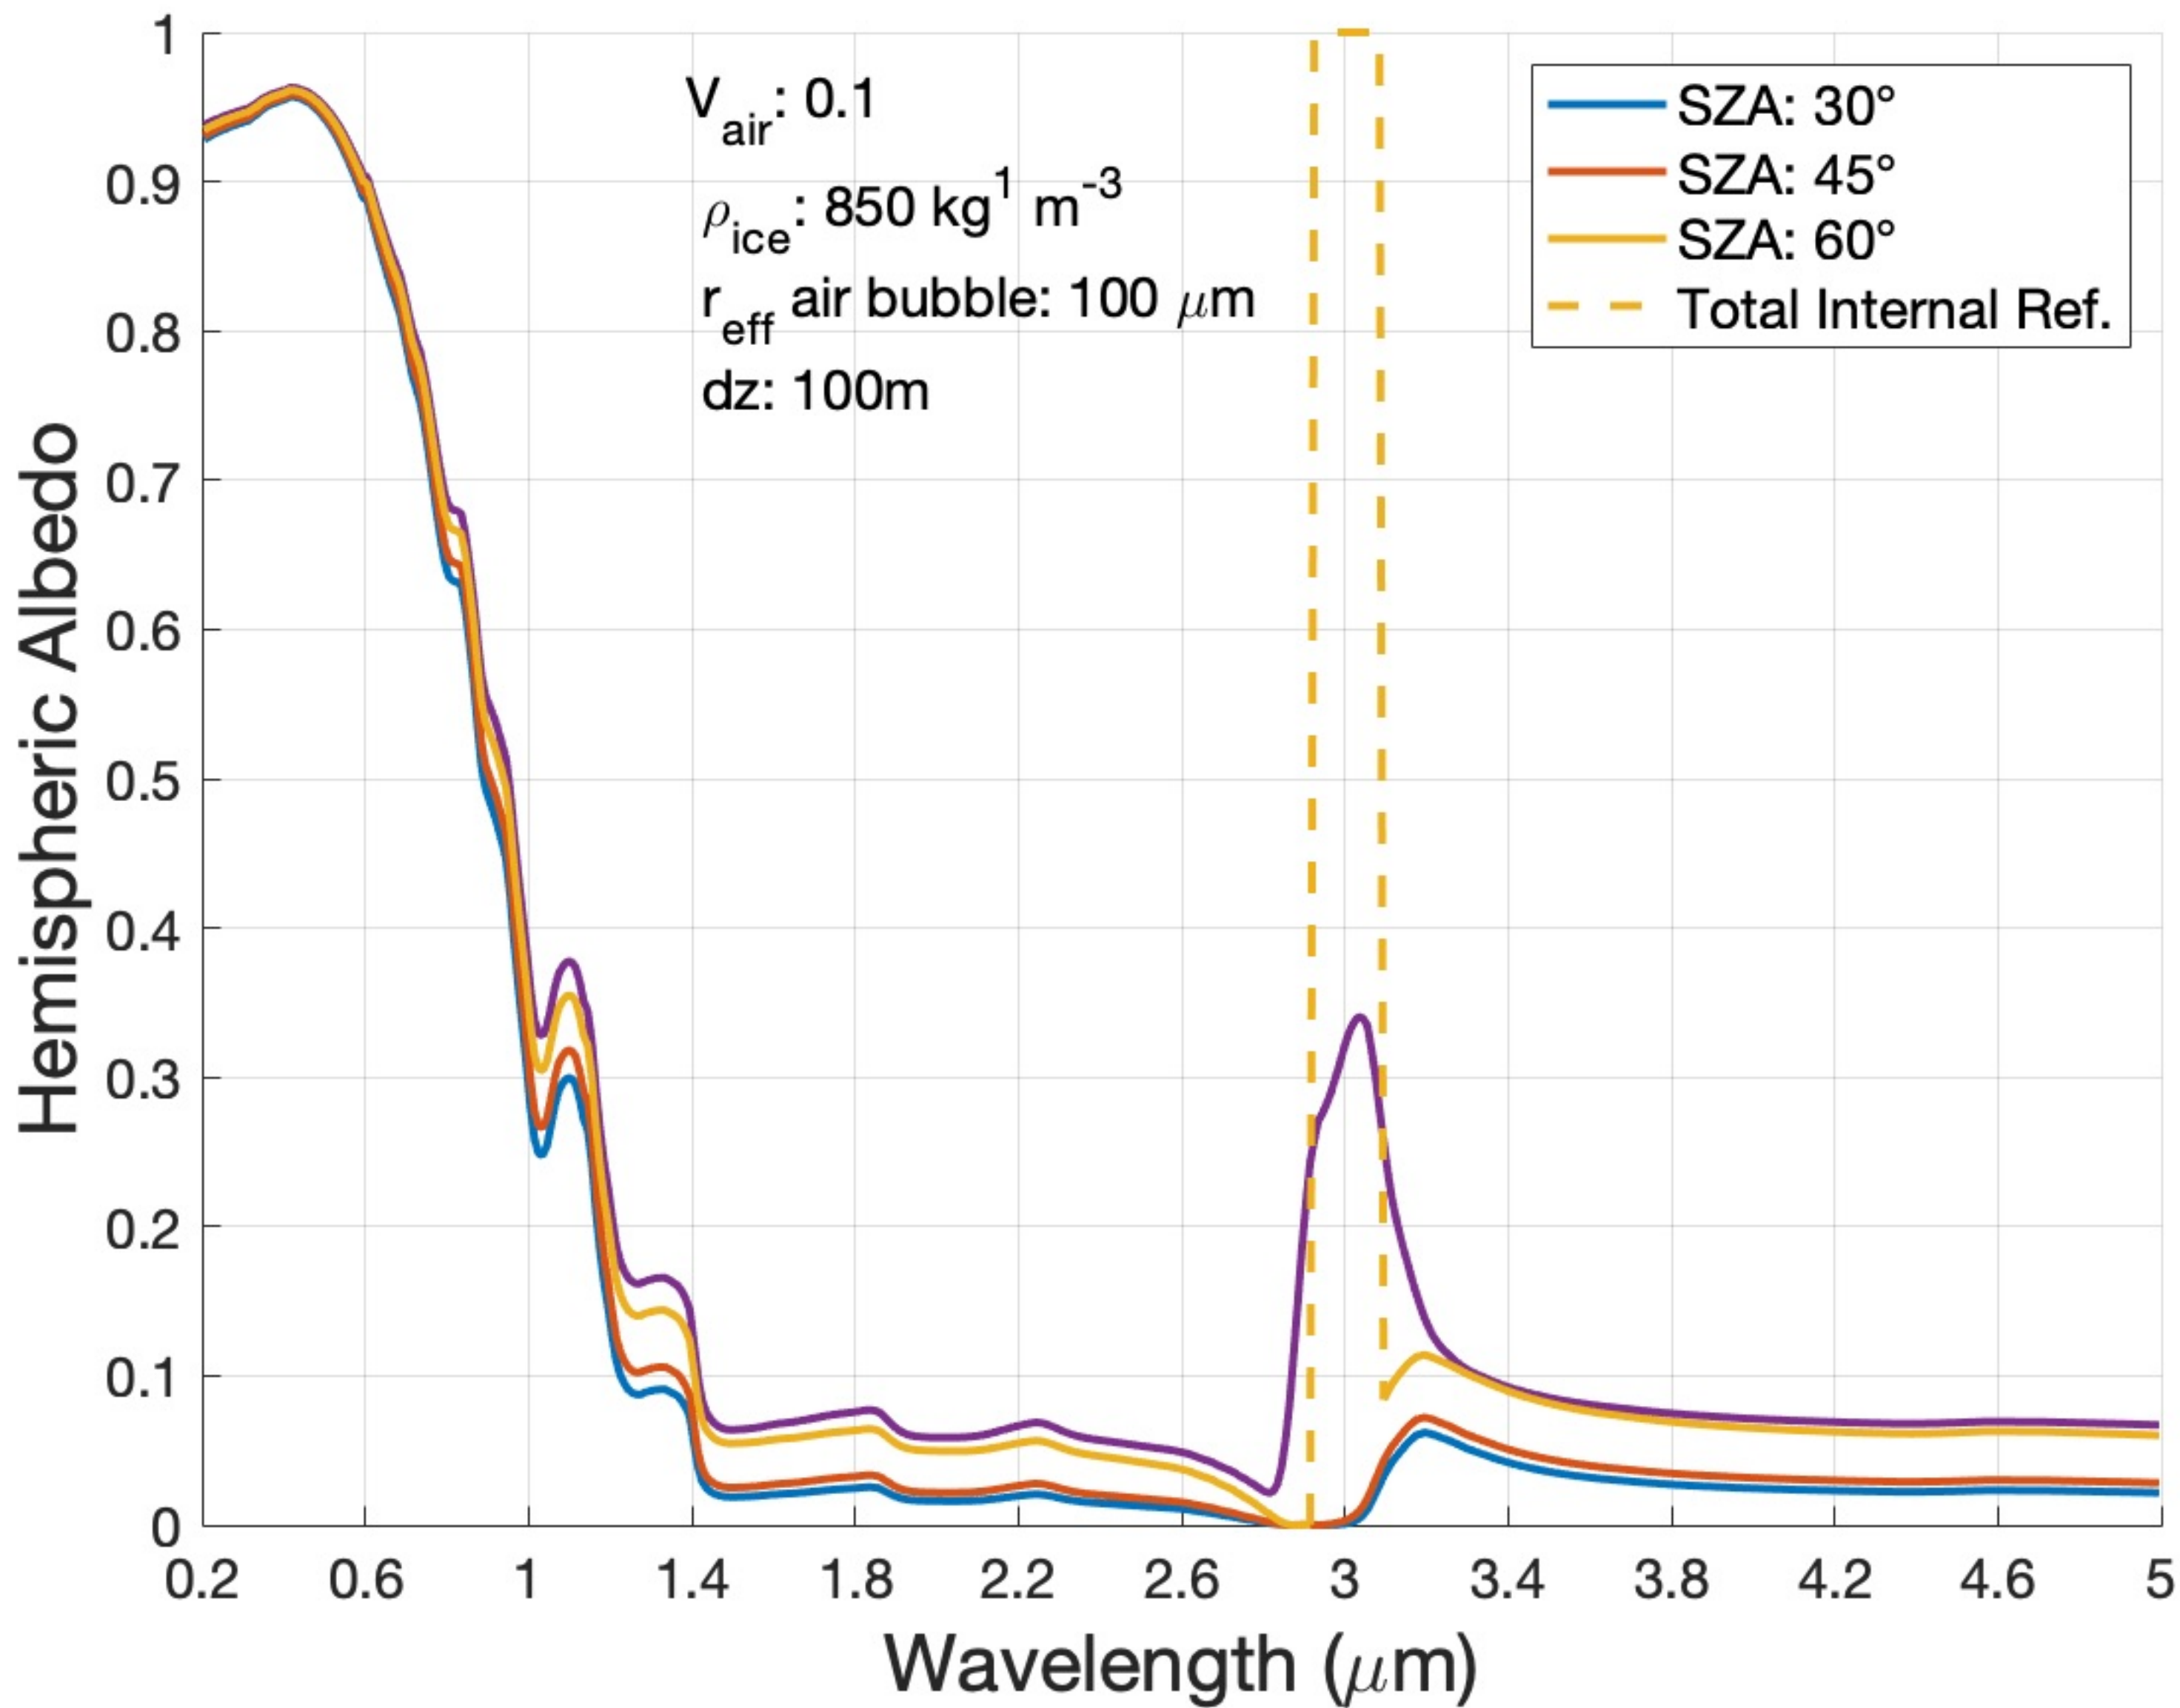

Hemispheric Albedo

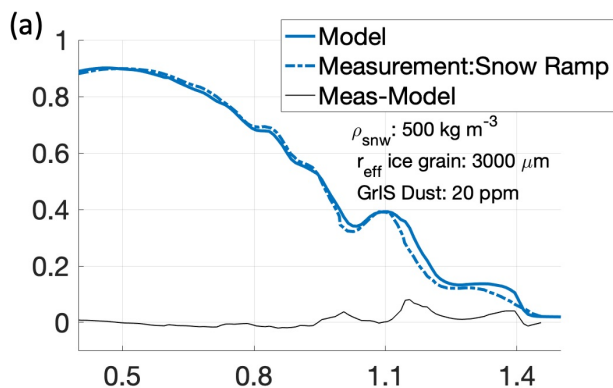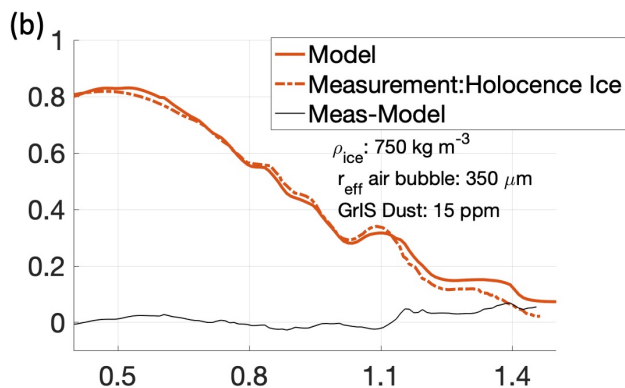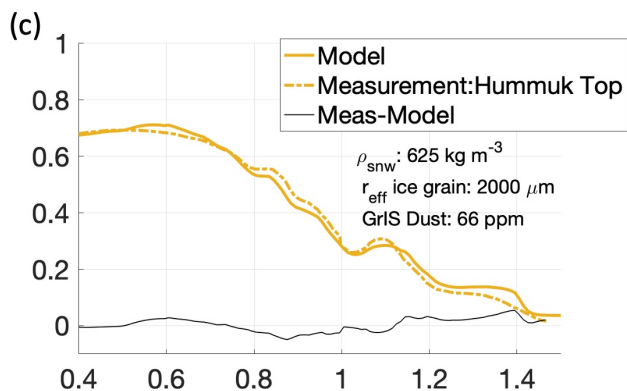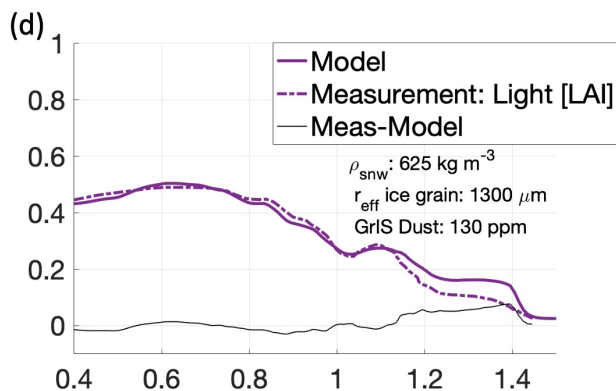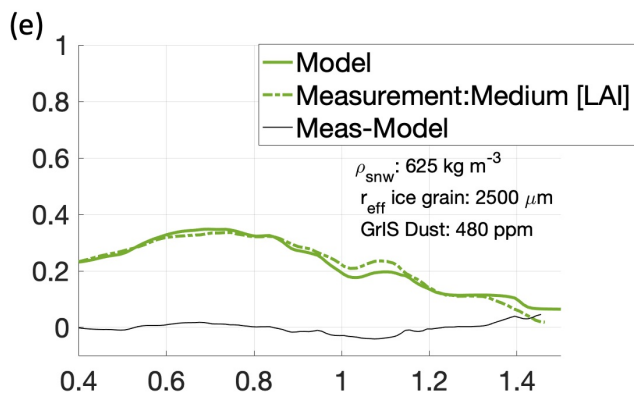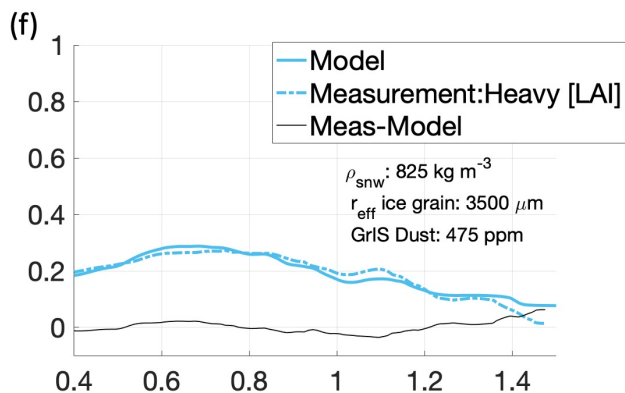

Wavelength ( $\mu\text{m}$ )
